# Supplementary material for: Pseudomonas aeruginosa Alters Critical Lung Epithelial Cell Functions through Activation of ADAM17
Source: MDPI journal article supplement (doi:10.3390/cells11152303), 2022-07-26
Supplement: s1 [file s1]

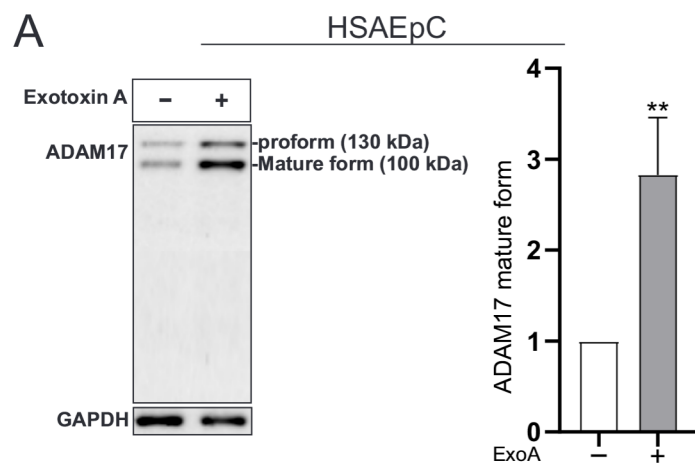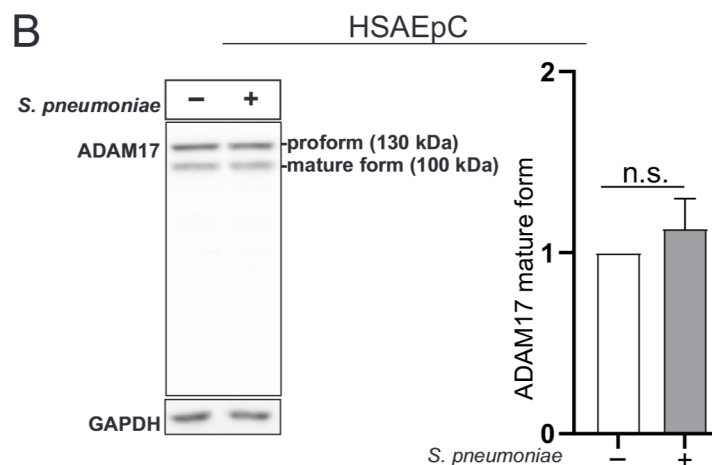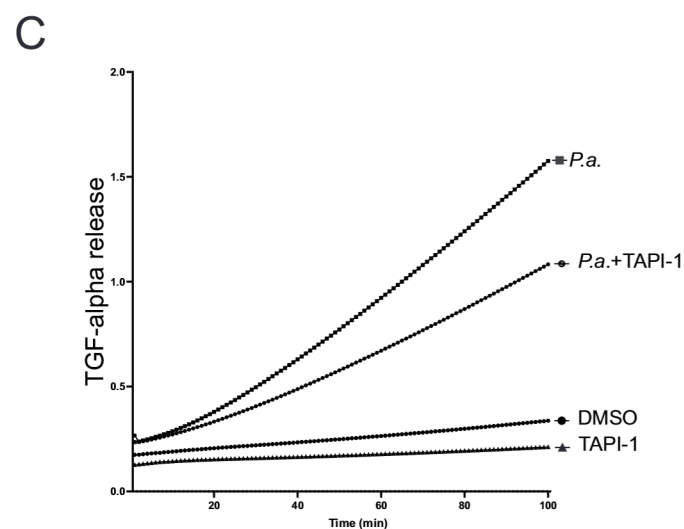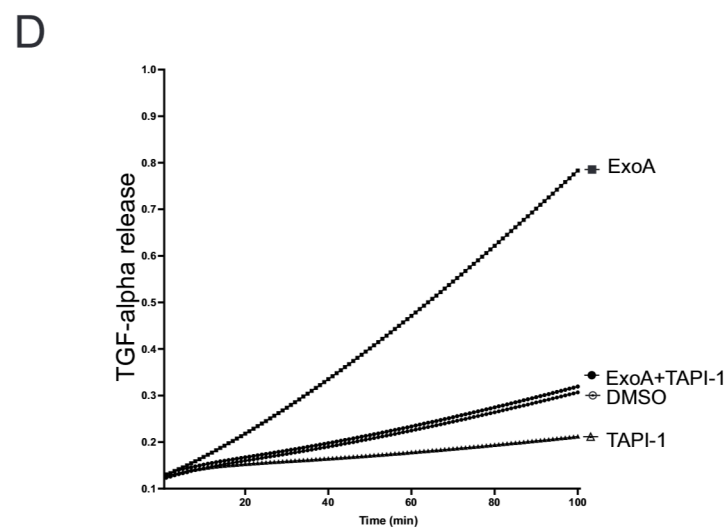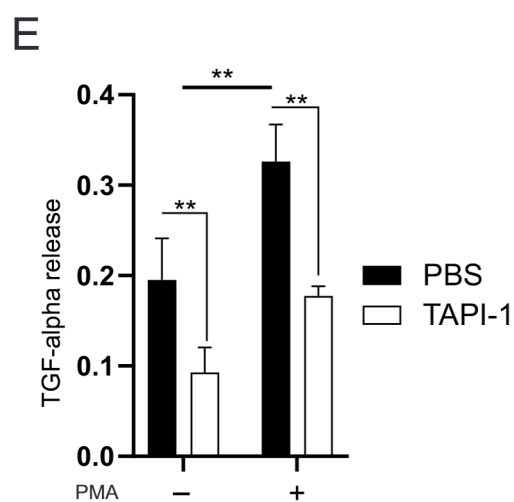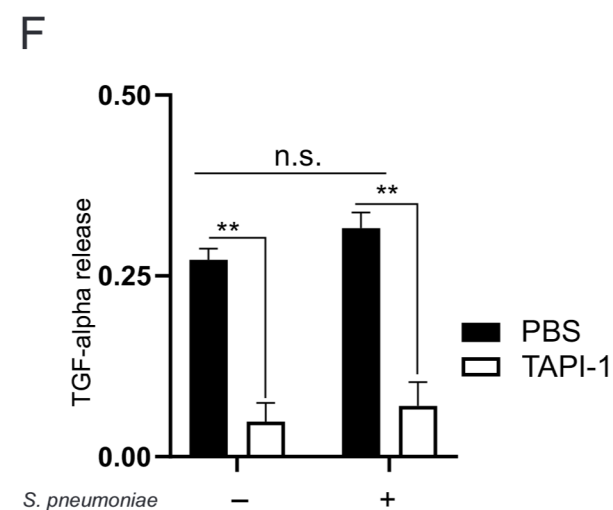

**Figure S1. Pathogen specific regulation of ADAM17.** (A-B) Human small airway epithelial cells (HSAEpC) were grown until confluence and either left unstimulated, stimulated with ExoA (A, 100 ng/ml) or *S. pneumoniae* (B, MOI 5). Samples were prepared after 4 h of incubation, and the protein expression and maturation of ADAM17 were analyzed by Western blot using an antibody against the C-terminus (intracellular part). The protein expression of GAPDH served as loading control. Band intensities were evaluated by densitometry and normalized to the expression of the unstimulated cells. (C-F) A549 cells were transfected with a plasmid encoding for alkaline phosphatase (AP)-coupled TGF- $\alpha$  (AP-TGF- $\alpha$ ). Cells were pre-incubated for 30 min with TAPI-1 (10  $\mu$ M) or 0.1% DMSO as a vehicle control and subsequently left unstimulated, infected with *P. aeruginosa* (C, MOI 5 for 4 h) or stimulated with ExoA (D, 100 ng/ml for 4 h), stimulated with PMA (E, 1  $\mu$ M for 1 h) or infected with *S. pneumoniae* (F, MOI 5 for 4 h). Subsequently, the cells were lysed and the AP activity was analyzed in both the cell lysate and the supernatant as an indicator for TGF- $\alpha$  cleavage and release and calculated as ratio of AP-TGF- $\alpha$  activity in the supernatant to the total activity (lysate and supernatant). Representative measurements of AP-TGF- $\alpha$  activity in the supernatant of *P. aeruginosa* infected and ExoA stimulated cell, respectively, are shown in C and D. Quantitative data are shown as means + SD of three independent experiments. Asterisks indicate significance difference to the control calculated using two tailed two samples t-test in A and B and two-way ANOVA and Tukey post-test in E and F (\*\*  $p < 0.01$ , n.s. not significant).

A

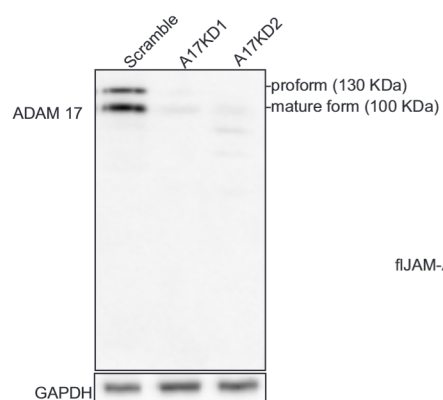

B

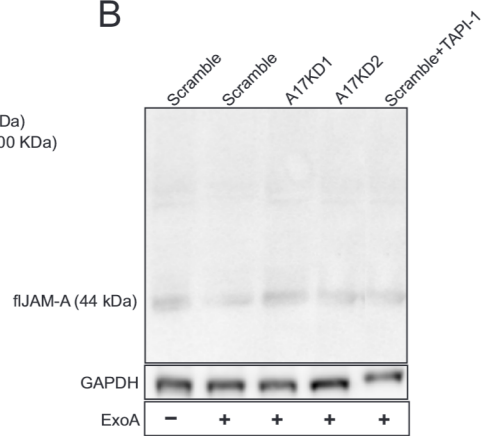

C

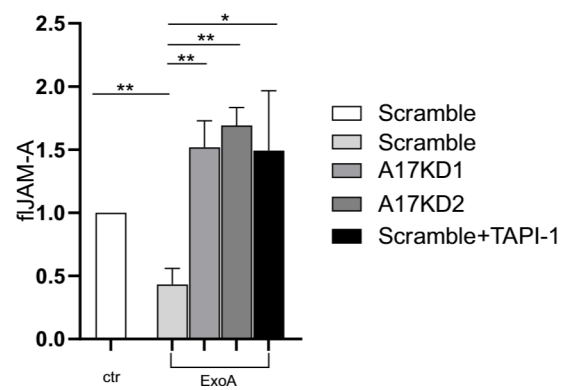

**Figure S2. Control experiments and JAM-A shedding upon ExoA stimulation.** A549 cells were transduced with lentivirus encoding shRNA against ADAM17 for knockdown (KD) (A17KD1 or 17KD2) or unspecific shRNA (scramble, scr) as a control. **(A)** One week after transduction, the protein expression of ADAM17 was analyzed by Western blot using an antibody against the C-terminus (intracellular part). The protein expression of glyceraldehyde-3-phosphat dehydrogenase (GAPDH) served as loading control. **(B/C)** Cells were either left unstimulated or stimulated with Exo A (4 h, 100 ng/ml). Cells were lysed and the expression of JAM-A was analyzed by western blot using an antibody against the N-terminus (extracellular part). GAP DH served as a loading control. Band intensities were evaluated by densitometry and normalized to the expression of the unstimulated cells. A representative blot is shown in B. Quantitative data are shown as means + SD of three independent experiments. Asterisks indicate significance difference to the control calculated using two tailed two samples t-test (\*  $p < 0.05$ , \*\*  $p < 0.01$ ).
